# Supplementary material for: A DFT study to design super- and hyperacids with 1-(cyclopenta-2,4-dien-1-yl)-4-nitrobenzene and 3-(cyclopenta-2,4-dien-1-ylmethylene)-6-methylenecyclohexa-1,4-diene molecules
Source: Royal Society of Chemistry journal article supplement (doi:10.1039/c6nj03529a), 2017-01-01
Supplement: c6nj03529a1.pdf [file c6nj03529a1.pdf]

## Electronic Supplementary Information for

# DFT study to design Super- and Hyperacids with 1-(cyclopenta-2,4-dien-1-yl)-4-nitrobenzene and 3-(cyclopenta-2,4-dien-1-ylmethylene)-6-methylenecyclohexa-1,4-diene molecules

Mrinal Kanti Si<sup>1,2</sup>, Bishwajit ganguly\*<sup>1,2</sup>

<sup>1</sup>Computation and Simulation Unit (Analytical Discipline and Centralized Instrument Facility), CSIR-Central Salt & Marine Chemicals Research Institute

<sup>2</sup>Academy of Scientific and Innovative Research, CSIR-CSMCRI, Bhavnagar, Gujarat, India-364 002.

\*Corresponding Author. Fax: (+91)-278-2567562, E-mail: [ganguly@cmcri.org](mailto:ganguly@cmcri.org)

## Theoretical Methods

The gas phase acidity is measured by the calculating the enthalpy change ( $\Delta H_{\text{acid}}$ ) for the proton dissociation reaction given below

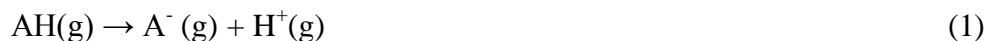

Where  $\Delta H_{\text{acid}}$  can be calculated by the equation 2

$$\Delta H_{\text{acid}} = \Delta E_{\text{acid}} + \Delta(pV) \quad (2)$$

$\Delta E_{\text{acid}}$  is the change of total molecular energy of the species involved in the equation 1 and the electronic energy involves the electronic energy, the repulsion of nuclei, the zero point vibrational energy (ZPVE) and the finite room temperature correction at 298.15 K.

The DFT-B3LYP method gives the satisfactory result for calculating the acidity which is comparable to experimental result <sup>1, 2</sup>. The series of papers published that reported the DFT methods are useful for calculating the electron affinity of molecules <sup>3-7</sup>. Hence we have optimized the compounds in B3LYP/6-31G(d) and further the single point energy calculated in

B3LYP/6-311+G(2d,P) method. We have calculated the acidities of the compounds in solvent medium. The PCM solvent model is important for determining the acidity<sup>8,9</sup>. We have calculated the acidity of compounds **4a** in DMSO solvent which based on previously reported the proton transfer reaction between solvated acids and dimethyl sulfoxide molecule<sup>10</sup>.

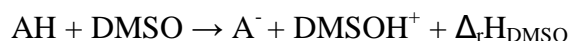

Where  $\text{A}^-$  is the conjugate base and  $\Delta_r H_{\text{DMSO}}$  is enthalpy change in above equation. All calculations are performed at IPCM/B3LYP/6-311+G(2d,p)//B3LYP/6-31G(d) level of theory by using the thermal correction at B3LYP/6-31G(d) level of theory. We have calculated the pKa values for compound **4a** by using equation 3 which is previous reported to calculate the pKa for neutral organic acid<sup>10</sup>.

$$\text{pKa}(\text{exp}) = 0.661. \Delta_r H_{\text{DMSO}} - 7.7 \quad (3)$$

All calculations were performed with the GAUSSIAN09 program package<sup>11</sup>.

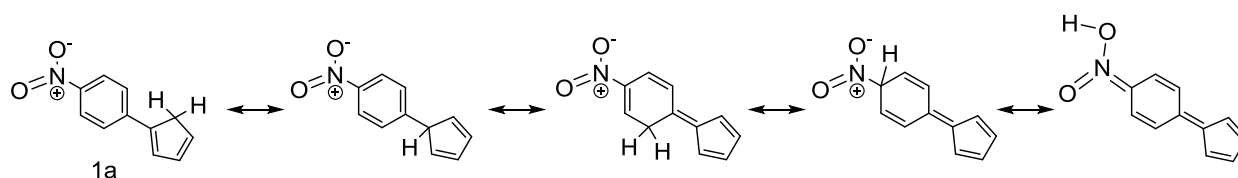

**Scheme S1** The process of tautomerization of hydrogen from  $\text{sp}^3$  carbon atom of **1a** on the nitro group, forming  $-\text{N}(\text{O})\text{OH}$ .

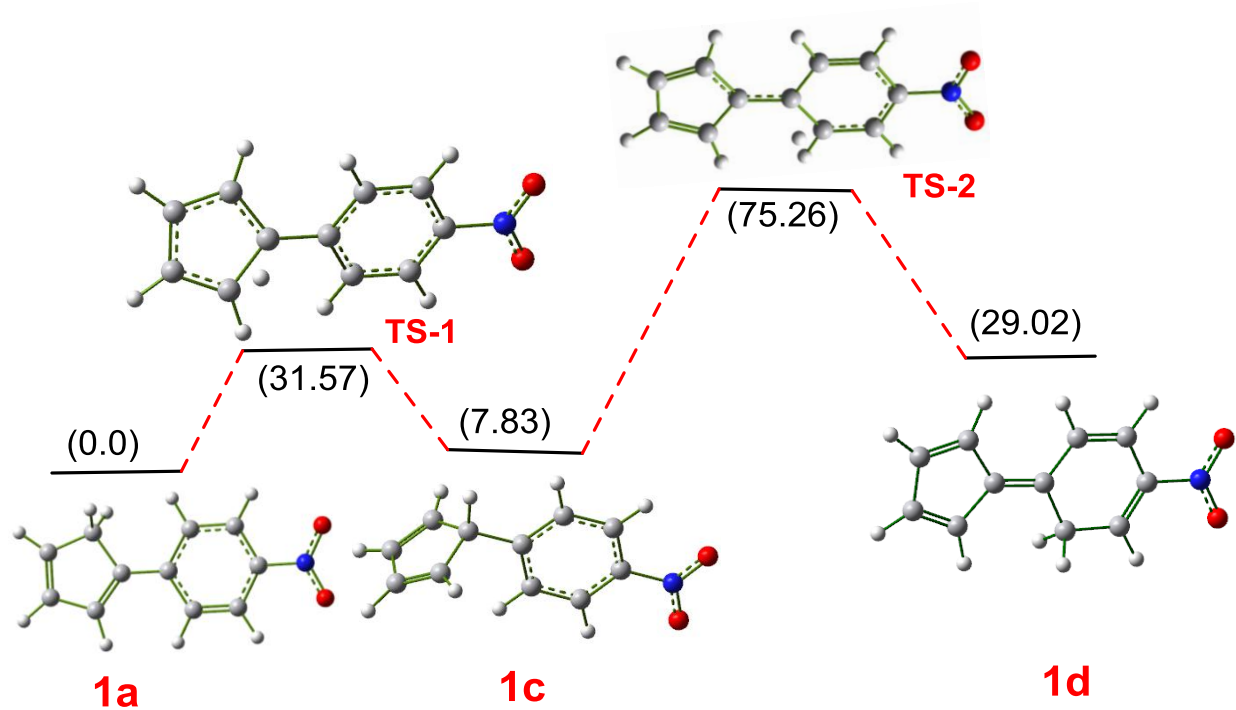

**Figure S1** The potential energy diagram for the transfer of proton from  $sp^3$  carbon center of **1a** to  $sp^2$  carbon center of **1c** and from **1c** to **1d** at B3LYP/6-311+G(2d, p)//B3LYP/6-31G(d) method. (The energies are given in kcal/mol)

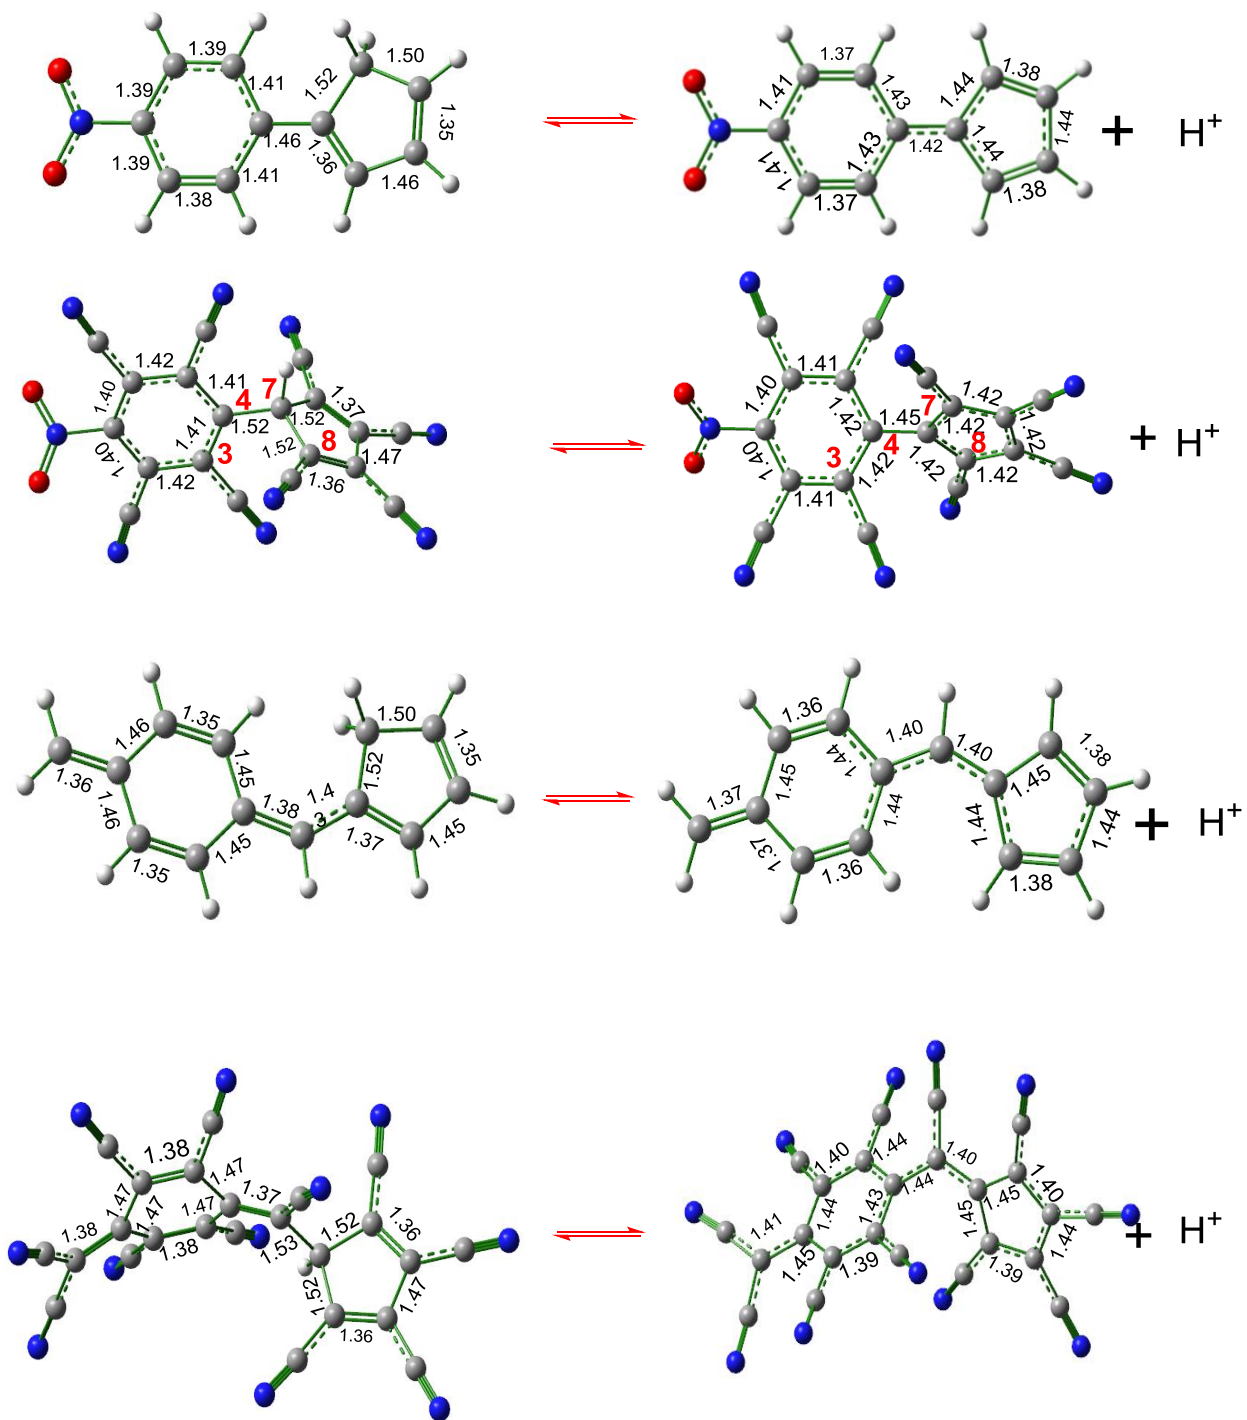

**Figure S2** The geometrical parameters for **1a**, **2a**, **3a** and **4a** molecules and their conjugate bases. (The red color numbers indicate the dihedral angle (-C<sub>3</sub>-C<sub>4</sub>-C<sub>7</sub>-C<sub>8</sub>)

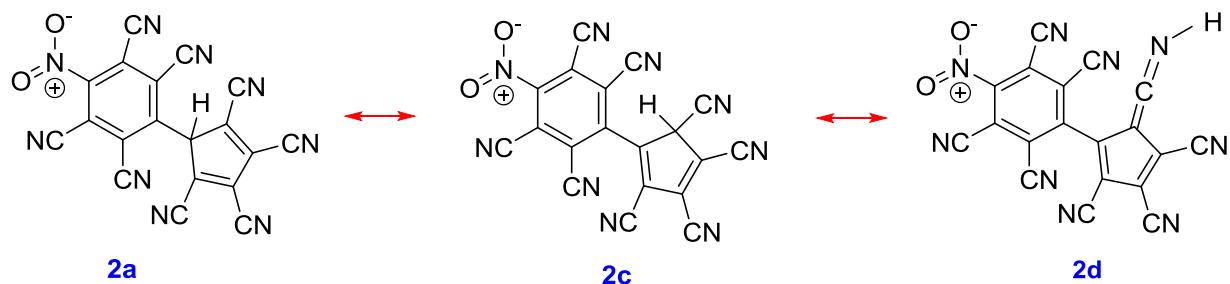

**Scheme S2** The process of tautomerization of hydrogen from  $sp^3$  carbon atom of **2a**, forming ketene imine (**2d**).

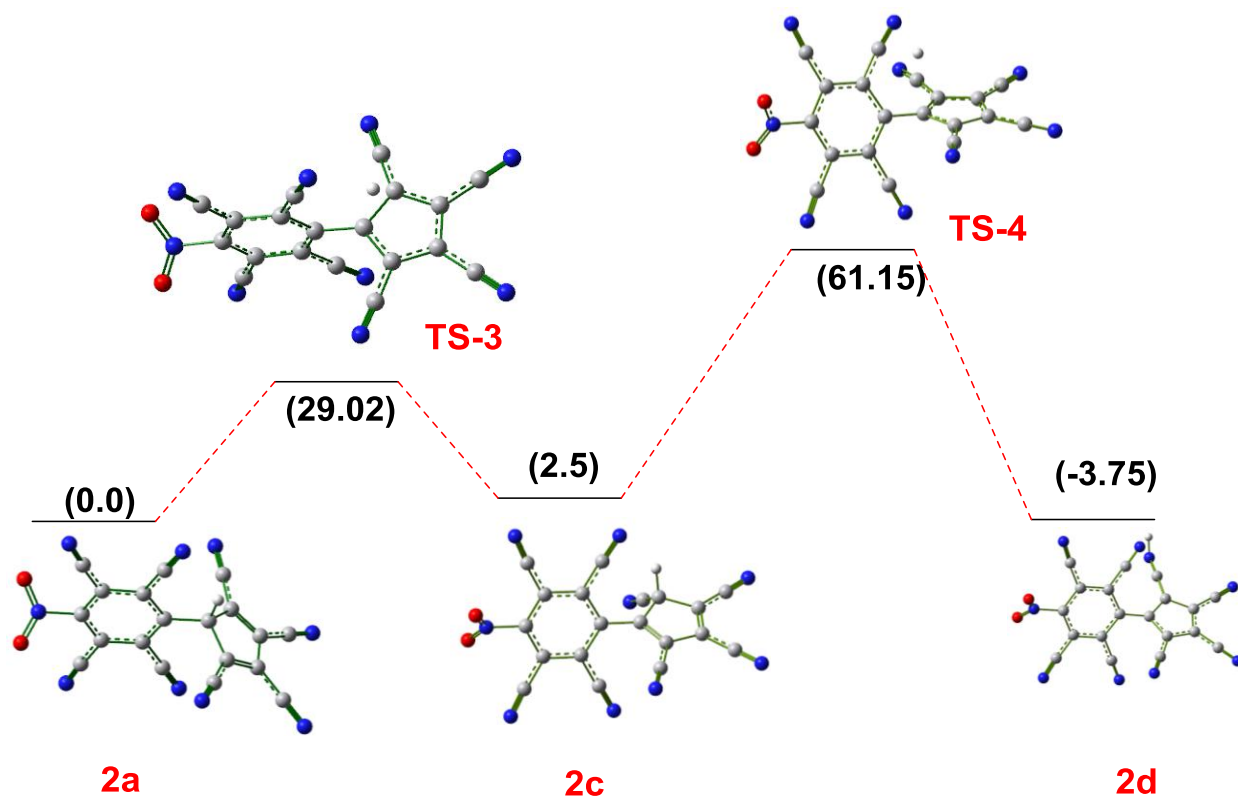

**Figure S3** The potential energy diagram for the transfer of proton from **2a** to **2d** at B3LYP/6-311+G(2d, p)//B3LYP/6-31G(d) method. (The energies are given in kcal/mol).

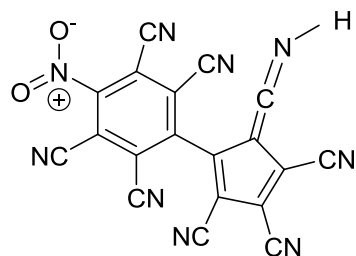

**2d**  
**(-3.7)**

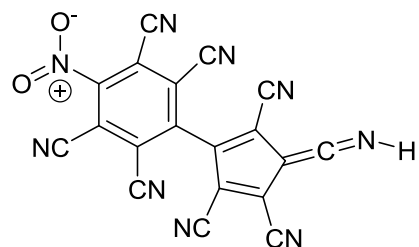

**2e**  
**(-6.3)**

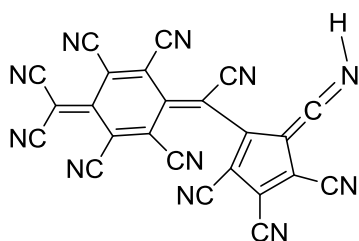

**4d**  
**(-3.0)**

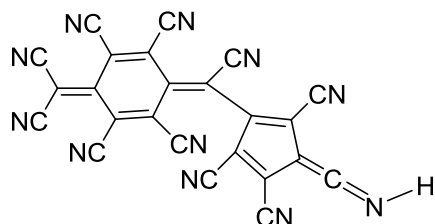

**4e**  
**(-7.9)**

**Figure S4** Structure of ketene imine tautomers of octacyano substituted 1-(cyclopenta-2,4-dien-1-yl)-4-nitrobenzene and cyano group substituted 3-(cyclopenta-2,4-dien-1-ylmethylene)-6-methylenecyclohexa-1,4-diene and their relative energies with respect to tautomers (**2a** and **4a** respectively) obtained with B3LYP/6-311+G(2d,p)//B3LYP/6-31G(d) in gas phase (in kcal/mol)

**Table S1** The  $\Delta H_{\text{acid}}$  values calculated at B3LYP/6-311+G(2d,p)//B3LYP/6-31G(d) level of theory at gas phase for the compounds **2d**, **2e**, **4d**, and **4e**.

| Molecules | Energy      | $H_{\text{corrected}}$ | $\Delta H_{\text{acid}}$ |
|-----------|-------------|------------------------|--------------------------|
| <b>2d</b> | -1367.89780 | 0.18942                | 256.5                    |
| <b>2e</b> | -1367.90185 | 0.18950                | 258.9                    |
| <b>2'</b> | -1367.48015 | 0.17809                | -                        |
| <b>4d</b> | -1517.49048 | 0.22001                | 238.8                    |
| <b>4e</b> | -1517.49048 | 0.21020                | 246.63                   |
| <b>4'</b> | 1517.09638  | 0.2088                 | -                        |

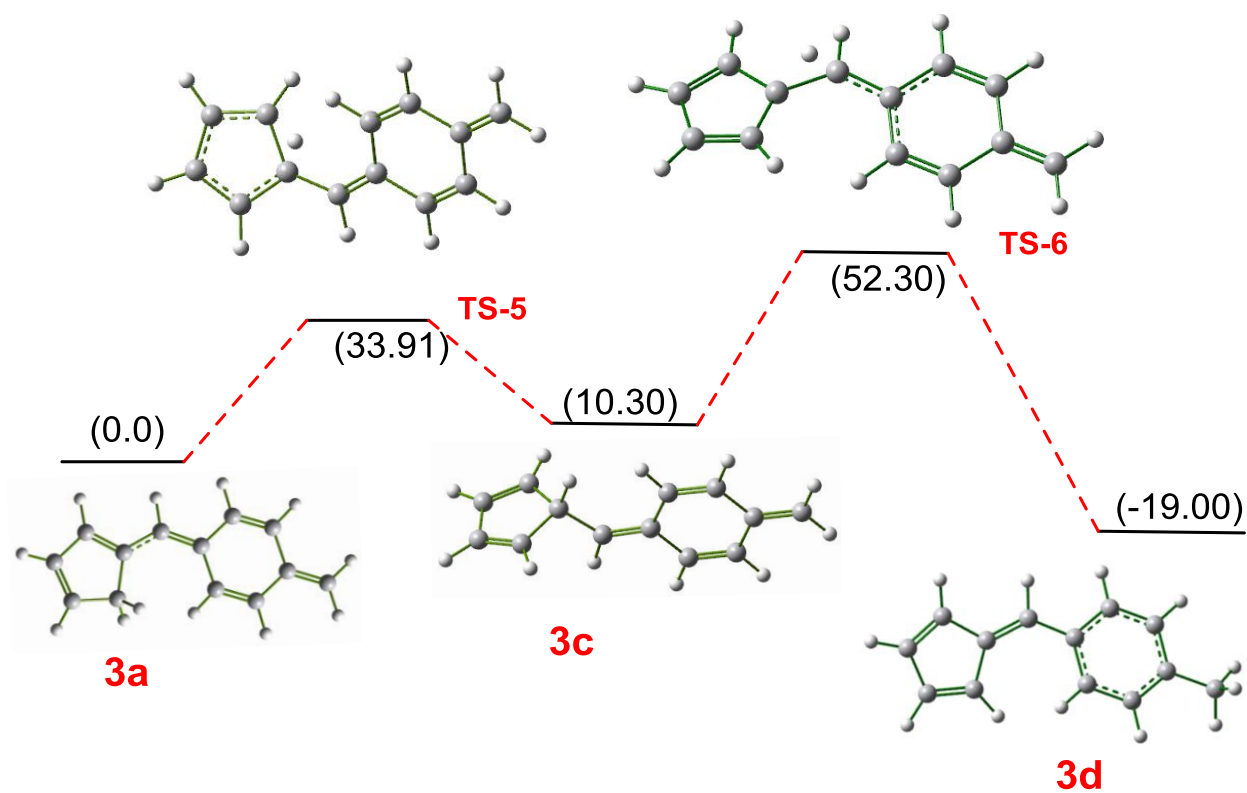

**Figure S5** The potential energy diagram for the transfer of proton from  $sp^3$  carbon center of **3a** to  $sp^2$  carbon center of **3c** and **3c** to **3d** with B3LYP/6-311+G(2d, p)//B3LYP/6-31G(d) level of theory. (The energies are given in kcal/mol).

## References

1. A. D. Becke, Phys. Rev., 1988, **A38**, 3098-3100.
2. C. Lee, W. Yang, R. G. Parr, Phys. Rev., 1988, **37**, 785-789.
3. R. A. King, J. M. Galbraith, H. F. Schaefer III, J. Chem. Phys., 1996, **100**, 6061-6068.
4. J. M. Galbraith, H. F. J. Schaefer III, Chem. Phys., 1996, **105**, 862-864.
5. Q. -Sh. Li, W. -G. Xu, Y. Xie, H. F. J. Schaefer III, J. Phys. Chem. A, 1999, **103**, 7496-7505.
6. J. C. Rienstra-Kiracofe, G. S. Tschumper, H. F. Schaefer III, N. Sreela, G. B. Ellison, Chem. Rev., 2002, **102**, 231-282.
7. Y. Xie, H. F. Schaefer III, F. A. Cotton, Chem. Commun., 2003, 102-103.
8. S. Miertuš, E. Scrocco, J. Tomasi, Chem phys., 1981, **55**, 117-129.
9. S. Miertuš, J. Tomasi, Chem phys., 1982, **65**, 239-245.
10. R. Vianello, Z. B. Maksić, Eur. J. Org. Chem., 2004, 5003-5010.
11. M. J. Frisch, G. W. Trucks, H. B. Schlegel, G. E. Scuseria, M. A. Robb, J. R. Cheeseman, G. Scalmani, V. Barone, B. Mennucci, G. A. Petersson, et al. Gaussian 09, Revision B01, Gaussian, Inc, Wallingford CT 2010.

**Table S2.** B3LYP/6-31G(d) optimized Cartesian coordinate of compounds **1a**, **2a**, **3a**, and **4a** (The electronic energies (E) are given in atomic unit).

| <b>1a</b>  |                   |             |             | <b>1<sup>+</sup></b> |                   |            |             |
|------------|-------------------|-------------|-------------|----------------------|-------------------|------------|-------------|
| <b>E =</b> | <b>-629.87011</b> |             |             | <b>E =</b>           | <b>-629.40585</b> |            |             |
| C          | 0.69107800        | 0.05654000  | -0.00000700 | C                    | -0.76203500       | 0.00000000 | -0.00001700 |
| C          | -0.01771600       | -1.16414500 | -0.00009400 | C                    | 0.00541100        | 1.21146500 | -0.00005000 |
| C          | -1.40597400       | -1.19894700 | -0.00008000 | C                    | 1.38131600        | 1.21646400 | -0.00006100 |



|                        |             |             |             |                        |             |             |             |
|------------------------|-------------|-------------|-------------|------------------------|-------------|-------------|-------------|
| C                      | -2.11144100 | 0.00310400  | 0.00002200  | C                      | 2.09560000  | 0.00000000  | -0.00003000 |
| C                      | -1.44944800 | 1.23291200  | 0.00011900  | C                      | 1.38131600  | -1.21646400 | 0.00001700  |
| C                      | -0.06372400 | 1.25151600  | 0.00010900  | C                      | 0.00541100  | -1.21146500 | 0.00003100  |
| H                      | 0.52736200  | -2.10250200 | -0.00018300 | H                      | -0.52127400 | 2.16076200  | -0.00008800 |
| H                      | -1.94973400 | -2.13564300 | -0.00015100 | H                      | 1.94061700  | 2.14514400  | -0.00010200 |
| H                      | -2.02838100 | 2.14826600  | 0.00021000  | H                      | 1.94061700  | -2.14514400 | 0.00005300  |
| H                      | 0.44530300  | 2.20975000  | 0.00021700  | H                      | -0.52127500 | -2.16076200 | 0.00010500  |
| C                      | 2.15114400  | 0.07234000  | -0.00003200 | C                      | -2.18402800 | 0.00000000  | 0.00003400  |
| C                      | 2.98463600  | 1.15161200  | -0.00024300 | C                      | -3.05032600 | -1.15370500 | 0.00009200  |
| C                      | 3.01674700  | -1.17324400 | 0.00016300  | C                      | -3.05032600 | 1.15370400  | 0.00029200  |
| H                      | 2.68299100  | 2.19345200  | -0.00045200 | H                      | -2.72527100 | -2.18896700 | 0.00003900  |
| C                      | 4.37559400  | 0.71601700  | -0.00015900 | C                      | -4.36320200 | -0.71886500 | -0.00022700 |
| H                      | 2.82739800  | -1.80706500 | -0.87878700 | H                      | -2.72527000 | 2.18896700  | 0.00053200  |
| C                      | 4.41988700  | -0.63388300 | 0.00007800  | C                      | -4.36320200 | 0.71886600  | 0.00012700  |
| H                      | 5.30580800  | -1.25797200 | 0.00018500  | H                      | -5.24711700 | -1.35142000 | -0.00049100 |
| N                      | -3.57449900 | -0.02379600 | 0.00003700  | H                      | -5.24711700 | 1.35142100  | 0.00018800  |
| O                      | -4.16895200 | 1.05620200  | 0.00011000  | N                      | 3.51473800  | 0.00000000  | -0.00004100 |
| O                      | -4.12941500 | -1.12465800 | -0.00005700 | O                      | 4.12045800  | -1.09542400 | -0.00004400 |
| H                      | 5.22560600  | 1.38981200  | -0.00028300 | O                      | 4.12045800  | 1.09542300  | -0.00010600 |
| H                      | 2.82737900  | -1.80680800 | 0.87929300  |                        |             | <b>2'</b>   |             |
|                        |             | <b>2a</b>   |             | <b>E = -1367.48015</b> |             |             |             |
| <b>E = -1367.89176</b> |             |             |             | C                      | -0.13386000 | -0.00033900 | -0.00029500 |
| C                      | -0.18716600 | 0.43327400  | 0.02479200  | C                      | -0.87066800 | 1.13376800  | -0.42979000 |
| C                      | -1.24285000 | 1.36429700  | 0.07208200  | C                      | -2.28447500 | 1.15156900  | -0.40595500 |
| C                      | -2.59625700 | 0.94499600  | 0.03634100  | C                      | -2.97345600 | -0.00004900 | -0.00029400 |
| C                      | -2.87446300 | -0.42421200 | -0.01726900 | C                      | -2.28467900 | -1.15180600 | 0.40532500  |
| C                      | -1.85078100 | -1.37824900 | -0.05089800 | C                      | -0.87087900 | -1.13426700 | 0.42921400  |
| C                      | -0.50461400 | -0.93703100 | -0.04441700 | C                      | 1.32535200  | -0.00027700 | -0.00005700 |
| C                      | 1.25451500  | 0.92437600  | 0.04900700  | C                      | 2.16499700  | -0.92864500 | -0.67444200 |
| C                      | 2.11739800  | 0.59363300  | -1.15733300 | C                      | 2.16458700  | 0.92830800  | 0.67455300  |
| C                      | 2.12281100  | 0.46255500  | 1.20728700  | C                      | 3.51254400  | -0.56890900 | -0.42434000 |
| C                      | 3.33451900  | 0.13870500  | -0.73583200 | C                      | 3.51229600  | 0.56899700  | 0.42471100  |
| C                      | 3.33780300  | 0.05705500  | 0.73265200  | N                      | -4.44433700 | 0.00019200  | -0.00010700 |
| N                      | -4.28448900 | -0.87525000 | -0.03866500 | O                      | -5.00170700 | -1.02479800 | -0.38130600 |
| O                      | -4.56516000 | -1.81302100 | 0.69509200  | O                      | -5.00125700 | 1.02537000  | 0.38123300  |
| O                      | -5.03692700 | -0.26738700 | -0.78773300 | C                      | -0.19080300 | -2.26664800 | 0.98454300  |
| C                      | 0.53740500  | -1.91697600 | -0.10630200 | C                      | -2.97059100 | -2.31759800 | 0.87999100  |
| C                      | -2.11804700 | -2.78191000 | -0.13164300 | C                      | -2.97018800 | 2.31768700  | -0.88011400 |
| C                      | -3.62850800 | 1.93434200  | 0.09524800  | C                      | -0.19034100 | 2.26630800  | -0.98450700 |
| C                      | -0.95637700 | 2.76591000  | 0.15454600  | C                      | 1.72218800  | 1.96057700  | 1.53958600  |
| C                      | 1.68909600  | 0.80925500  | -2.48792100 | C                      | 1.72312300  | -1.96086500 | -1.53979800 |
| C                      | 4.44200800  | -0.20199800 | -1.55957400 | C                      | 4.65833400  | -1.21846800 | -0.94835200 |
| C                      | 4.44877200  | -0.37284700 | 1.50860200  | C                      | 4.65777900  | 1.21889100  | 0.94897500  |
| N                      | -2.25947300 | -3.93141800 | -0.22486100 | N                      | -3.46303500 | -3.28062800 | 1.30467800  |
| N                      | 1.39506400  | -2.69970100 | -0.15648100 | N                      | 0.31611900  | -3.18660300 | 1.48240500  |
| N                      | -4.40985700 | 2.79091300  | 0.17220700  | N                      | -3.46266900 | 3.28093400  | -1.30426500 |
| N                      | -0.68227600 | 3.89394700  | 0.22119700  | N                      | 0.31711900  | 3.18626900  | -1.48181000 |
| N                      | 1.28425000  | 0.99119900  | -3.56446300 | N                      | 1.32773600  | -2.79395300 | -2.25292900 |
| N                      | 5.35527300  | -0.47698900 | -2.22416300 | N                      | 5.60003400  | -1.75210400 | -1.37965900 |
| N                      | 5.36482500  | -0.71998300 | 2.13444900  | N                      | 5.59921700  | 1.75296200  | 1.38031400  |
| H                      | 1.22501400  | 2.02453000  | 0.10979300  | N                      | 1.32640900  | 2.79379100  | 2.25235300  |
| C                      | 1.70011300  | 0.52958100  | 2.55534700  |                        |             | <b>3'</b>   |             |



|   |             |             |             |   |            |             |             |
|---|-------------|-------------|-------------|---|------------|-------------|-------------|
| N | -0.77134900 | 4.10461400  | -0.20794000 | C | 1.21802800 | 2.54817600  | 0.83759700  |
| C | -0.22813900 | -1.40337700 | -2.06865800 | N | 1.34161800 | 3.62055300  | 1.27507200  |
| N | 0.40010000  | -2.02235600 | -2.82813900 | C | 1.11768900 | -1.12610300 | -1.71206600 |
| C | 1.38094300  | 1.79352300  | 0.63311800  | N | 0.23817200 | -1.50591700 | -2.37491900 |
| N | 1.87810200  | 2.62597400  | 1.27754200  | C | 3.97814900 | -2.14233600 | -1.87601900 |
| C | 3.30001700  | 0.76594200  | -2.17935900 | N | 4.37533600 | -2.98561900 | -2.57359100 |
| N | 3.27416300  | 1.28863900  | -3.21938400 | C | 5.72833800 | -0.48578000 | 0.03556900  |
| C | 5.70115800  | 0.15141100  | -0.35671700 | N | 6.87456000 | -0.63243200 | 0.17720100  |
| N | 6.82314800  | 0.38024500  | -0.55723900 | C | 3.99975200 | 1.56022400  | 1.44184000  |
| C | 4.68365100  | -1.24987700 | 2.18152300  | N | 4.43028800 | 2.28903700  | 2.24134300  |
| N | 5.37678700  | -1.60779800 | 3.04343600  |   |            |             |             |
| C | 1.61833900  | -1.53725000 | 1.98631400  |   |            |             |             |
| N | 0.84506000  | -2.00290400 | 2.72198800  |   |            |             |             |
| H | 1.63546400  | -1.22576900 | -0.89394400 |   |            |             |             |
